# Supplementary material for: New 10 Be exposure ages improve Holocene ice sheet thinning history near the grounding line of Pope Glacier, Antarctica
Source: Copernicus journal article supplement (doi:10.5194/tc-2022-82), 2022-05-05
Supplement: Supplementary file 1 [file Table_S1.xlsx]

## Sheet: Table S1
Table S1
¹⁰Be analytical data for calculating exposure ages
Sample ID	BAS ID	AMS ID$	Latitude	Longitude	Altitude	Sample Thickness	Quartz weight	9Be carrier	AMS measured ratio ¹⁰/⁹Be atoms	AMS measured 1σ uncertainty ¹⁰/⁹Be atoms	10Be conc.	1σ error	Blank used	10Be/9Be standard
		(Cathode)	DD	DD	(m a.s.l.)	(cm)	(g)	(g)			(at.g-1)	(at.g-1)
CIN-101	R15.8.1	XBE0971	-75.2194	-111.023	239	4.292	35.228	0.000255476	1.0566e-13	2.62412e-15	49987.1	1284.36	BLK140920A	07KNSTD
CIN-102	R15.8.2	XBE0972	-75.2194	-111.023	239	3.092	35.066	0.000256007	1.0716e-13	2.58188e-15	51054.3	1272.53	BLK140920A	07KNSTD
CIN-103	R15.8.3	XBE0973	-75.2194	-111.022	238	2.883	18.634	0.000255779	5.2576e-14	1.95695e-15	45923.9	1827.05	BLK140920A	07KNSTD
CIN-104	R15.8.4	XBE0974	-75.2193	-111.022	233	3.772	35.049	0.000256463	9.8685e-14	2.48441e-15	47026.1	1228.2	BLK140920A	07KNSTD
CIN-105*	R15.8.5	XBE0975	-75.2193	-111.021	229	3.106	10.136	0.000255324	3.1172e-14	1.18667e-15	48248	2093.44	BLK140920A	07KNSTD
CIN-106	R15.8.6	XBE0976	-75.2193	-111.021	229	4.159	13.431	0.000256843	3.8478e-14	1.41146e-15	45964	1864.6	BLK140920A	07KNSTD
CIN-107	R15.8.7	XBE0978	-75.219	-111.02	225	3.636	35.064	0.000255931	9.8004e-14	2.36192e-15	46319	1169.6	BLK140920B	07KNSTD
CIN-108	R15.8.8	XBE0979	-75.2165	-111.02	181	3.327	27.756	0.000256539	6.7295e-14	2.04868e-15	39687.2	1290.82	BLK140920B	07KNSTD
CIN-109*	R15.8.9	XBE0980	-75.2164	-111.02	178	5.652	17.952	0.000256615	4.371e-14	1.46092e-15	38851.4	1450.27	BLK140920B	07KNSTD
CIN-110	R15.8.10	XBE0981	-75.2164	-111.02	178	5.107	32.685	0.000256539	8.0718e-14	2.09292e-15	40742.3	1118.91	BLK140920B	07KNSTD
CIN-111	R15.8.11	XBE0982	-75.2163	-111.019	180	3.308	35.226	0.000256311	8.9814e-14	2.43285e-15	42192.3	1199.88	BLK140920B	07KNSTD
CIN-112	R15.8.12	XBE0983	-75.2163	-111.018	179	2.75	35.13	0.000256311	9.0472e-14	2.35566e-15	42628.4	1166.07	BLK140920B	07KNSTD
Process Blanks
Blank	Blank ID	AMS ID	Quartz weight	9Be carrier	AMS measured ratio ¹⁰/⁹Be atoms	AMS 1σ uncertainty ¹⁰/⁹Be atoms	10Be	1σ error	10Be/9Be standard
		Cathode	(g)	(g)			(atoms)	(atoms)
A	BLK140920A	XBE0970	0	0.000253653	2.5081e-15	3.7474e-16	1.67596e+08	6351.7	07KNSTD
B	BLK140920B	XBE0977	0	0.000256159	3.0359e-15	4.14214e-16	2.02865e+08	7090.13	07KNSTD
Scoria Cone (CIN) Be samples and process blanks BLK140920A/B were prepared for analysis at the CosmIC labs, Imperial College London. AMS analysis was performed at ANSTO, Australia.
Be-10/Be-9 measurements are "normalized to the KN-5-3 standard with an assumed ratio of 6.320 x 10^-12 ( (t1/2=1.36 Ma, Nishiizumi et al., 2007)".
* - These samples were reprocessed because the originals were discarded due to suspected contamination.
